# Supplementary material
Source: PubMed Central journal article supplement (PMC6548460)
Supplement: NIHMS1031518-supplement-Supp_info.pdf [file NIHMS1031518-supplement-Supp_info.pdf]

**Supp. Table S1: Expert-curated variants meeting functional criteria (PS3/BS3).**

<sup>a</sup>Expert panel-curated variants that met either PS3 or BS3 functional criteria are listed by gene, cDNA, amino acid, and variant type. Variants were curated by expert panels using the following reference transcripts: *PTPN11* (NM\_002834.3), *BRAF* (NM\_004333.4), *MAP2K1* (NM\_002755.3), *MYH7* (NM\_000257.3), *HRAS* (NM\_005343.2), *RAF1* (NM\_002880.3), *KRAS* (NM\_004985.4), *SOS1* (NM\_005633.3), *SHOC2* (NM\_007373.3), and *MAP2K2* (NM\_030662.3). <sup>b</sup>Evidence Satisfied, as determined by expert panels in Gelb et al. (2018) and Kelly et al. (2018), displayed as the number satisfied in each abbreviated category described in Richards et al. (2015). The first letter of each code indicates support for a pathogenic (P) or benign (B) classification and the second letter indicates the assigned evidence strength: supporting (P), moderate (M), strong (S), very strong (VS), or stand-alone (A). <sup>c,d</sup> The final variant classification assessed according to categorical ACMG/AMP combining rules (Table 5 in Richards et al., 2015), with Expert Panel (EP) variant classifications considering only evidence satisfied in (b). Variant class according to the categorical combining rules if PS3 had not been met is shown as “-PS3” in (c), and if BS3 had not been met in shown as “-BS3” is (d). <sup>e</sup>Variant class according to the quantitative, Bayesian-adapted framework was determined by posterior probability of pathogenicity (Post\_P). Post\_P was calculated by entering evidence totals by strength in Supplemental Table 1 from Tavgitgian et al. (2018), using the default settings: Prior Probability (Prior\_P) = 0.100; Odds Path Very Strong = 350; Exponential progression (X) = 2.000. Each Post\_P was then assigned a variant classification as follows: benign <0.001; 0.001 ≤ likely benign < 0.1; 0.1 ≤ VUS < 0.90; 0.90 ≤ likely pathogenic < 0.99; 0.99 ≤ pathogenic. ACMG/AMP, American College of Medical Genetics and Genomics/Association for Molecular Pathology; BS3, well-established functional studies show no deleterious effect; EP, Expert Panel; LB, likely benign; LP, likely pathogenic; P, pathogenic; Post\_P, posterior probability of pathogenicity; PS3, well established functional studies show a deleterious effect; VUS, variant of uncertain significance.

| EP classified as pathogenic, met PS3 <sup>a</sup> |           |             |              | Evidence Satisfied (MET PS3) <sup>b</sup> |    |    |     |    |    |    | Categorical <sup>c</sup> |      | Quantitative <sup>e</sup> |        |
|---------------------------------------------------|-----------|-------------|--------------|-------------------------------------------|----|----|-----|----|----|----|--------------------------|------|---------------------------|--------|
| Gene                                              | cDNA      | Amino Acid  | Variant Type | PP                                        | PM | PS | PVS | BP | BS | BA | EP Class                 | -PS3 | Class                     | Post_P |
| <i>PTPN11</i>                                     | c.794G>A  | p.Arg265Gln | Missense     | 2                                         | 2  | 2  | 1   | 0  | 0  | 0  | P                        | P    | P                         | 1.000  |
| <i>BRAF</i>                                       | c.770A>G  | p.Gln257Arg | Missense     | 2                                         | 2  | 1  | 1   | 0  | 0  | 0  | P                        | P    | P                         | 1.000  |
| <i>BRAF</i>                                       | c.1406G>A | p.Gly469Glu | Missense     | 2                                         | 2  | 1  | 1   | 0  | 0  | 0  | P                        | P    | P                         | 1.000  |
| <i>MAP2K1</i>                                     | c.389A>G  | p.Tyr130Cys | Missense     | 2                                         | 2  | 1  | 1   | 0  | 0  | 0  | P                        | P    | P                         | 1.000  |
| <i>MYH7</i>                                       | c.2155C>T | p.Arg719Trp | Missense     | 1                                         | 3  | 4  | 0   | 0  | 0  | 0  | P                        | P    | P                         | 1.000  |
| <i>MYH7</i>                                       | c.1357C>T | p.Arg453Cys | Missense     | 1                                         | 2  | 4  | 0   | 0  | 0  | 0  | P                        | P    | P                         | 1.000  |
| <i>PTPN11</i>                                     | c.922A>G  | p.Asn308Asp | Missense     | 2                                         | 1  | 4  | 0   | 0  | 0  | 0  | P                        | P    | P                         | 1.000  |
| <i>HRAS</i>                                       | c.34G>A   | p.Gly12Ser  | Missense     | 2                                         | 3  | 3  | 0   | 0  | 0  | 0  | P                        | P    | P                         | 1.000  |

|               |           |             |          |   |   |   |   |   |   |   |   |    |   |       |
|---------------|-----------|-------------|----------|---|---|---|---|---|---|---|---|----|---|-------|
| <i>MYH7</i>   | c.1208G>A | p.Arg403Gln | Missense | 1 | 3 | 3 | 0 | 0 | 0 | 0 | P | P  | P | 1.000 |
| <i>RAF1</i>   | c.775T>A  | p.Ser259Thr | Missense | 4 | 2 | 3 | 0 | 0 | 0 | 0 | P | P  | P | 1.000 |
| <i>KRAS</i>   | c.40G>A   | p.Val14Ile  | Missense | 2 | 2 | 3 | 0 | 0 | 0 | 0 | P | P  | P | 1.000 |
| <i>PTPN11</i> | c.1403C>T | p.Thr468Met | Missense | 2 | 2 | 3 | 0 | 0 | 0 | 0 | P | P  | P | 1.000 |
| <i>SOS1</i>   | c.1642A>C | p.Ser548Arg | Missense | 2 | 2 | 3 | 0 | 0 | 0 | 0 | P | P  | P | 1.000 |
| <i>SHOC2</i>  | c.4A>G    | p.Ser2Gly   | Missense | 1 | 2 | 3 | 0 | 0 | 0 | 0 | P | P  | P | 1.000 |
| <i>BRAF</i>   | c.736G>C  | p.Ala246Pro | Missense | 2 | 3 | 2 | 0 | 0 | 0 | 0 | P | P  | P | 1.000 |
| <i>BRAF</i>   | c.1741A>G | p.Asn581Asp | Missense | 2 | 2 | 2 | 0 | 0 | 0 | 0 | P | P  | P | 1.000 |
| <i>BRAF</i>   | c.1787G>T | p.Gly596Val | Missense | 2 | 2 | 2 | 0 | 0 | 0 | 0 | P | P  | P | 1.000 |
| <i>KRAS</i>   | c.173C>T  | p.Thr58Ile  | Missense | 2 | 2 | 2 | 0 | 0 | 0 | 0 | P | P  | P | 1.000 |
| <i>KRAS</i>   | c.178G>C  | p.Gly60Arg  | Missense | 2 | 2 | 2 | 0 | 0 | 0 | 0 | P | P  | P | 1.000 |
| <i>KRAS</i>   | c.65A>G   | p.Gln22Arg  | Missense | 2 | 2 | 2 | 0 | 0 | 0 | 0 | P | P  | P | 1.000 |
| <i>MAP2K2</i> | c.383C>A  | p.Pro128Gln | Missense | 2 | 2 | 2 | 0 | 0 | 0 | 0 | P | P  | P | 1.000 |
| <i>PTPN11</i> | c.188A>G  | p.Tyr63Cys  | Missense | 2 | 2 | 2 | 0 | 0 | 0 | 0 | P | P  | P | 1.000 |
| <i>SOS1</i>   | c.322G>A  | p.Glu108Lys | Missense | 2 | 2 | 2 | 0 | 0 | 0 | 0 | P | P  | P | 1.000 |
| <i>MYH7</i>   | c.1594T>C | p.Ser532Pro | Missense | 2 | 2 | 2 | 0 | 0 | 0 | 0 | P | LP | P | 1.000 |
| <i>HRAS</i>   | c.350A>G  | p.Lys117Arg | Missense | 1 | 2 | 2 | 0 | 0 | 0 | 0 | P | LP | P | 0.999 |
| <i>RAF1</i>   | c.770C>T  | p.Ser257Leu | Missense | 1 | 2 | 2 | 0 | 0 | 0 | 0 | P | LP | P | 0.999 |
| <i>MAP2K1</i> | c.199G>A  | p.Asp67Asn  | Missense | 2 | 1 | 2 | 0 | 0 | 0 | 0 | P | LP | P | 0.999 |
| <i>PTPN11</i> | c.1510A>G | p.Met504Val | Missense | 2 | 1 | 2 | 0 | 0 | 0 | 0 | P | LP | P | 0.999 |
| <i>RAF1</i>   | c.1837C>G | p.Leu613Val | Missense | 1 | 1 | 2 | 0 | 0 | 0 | 0 | P | LP | P | 0.997 |
| <i>KRAS</i>   | c.458A>T  | p.Asp153Val | Missense | 0 | 1 | 2 | 0 | 0 | 0 | 0 | P | LP | P | 0.994 |
| <i>MAP2K1</i> | c.158T>C  | p.Phe53Ser  | Missense | 2 | 3 | 1 | 0 | 0 | 0 | 0 | P | LP | P | 0.999 |
| <i>MAP2K2</i> | c.170T>G  | p.Phe57Cys  | Missense | 2 | 3 | 1 | 0 | 0 | 0 | 0 | P | LP | P | 0.999 |
| <i>SOS1</i>   | c.508A>G  | p.Lys170Glu | Missense | 2 | 3 | 1 | 0 | 0 | 0 | 0 | P | LP | P | 0.999 |
| <i>SOS1</i>   | c.2536G>A | p.Glu846Lys | Missense | 2 | 3 | 1 | 0 | 0 | 0 | 0 | P | LP | P | 0.999 |
| <i>MAP2K2</i> | c.401A>G  | p.Tyr134Cys | Missense | 2 | 2 | 1 | 0 | 0 | 0 | 0 | P | LP | P | 0.994 |
| <i>PTPN11</i> | c.417G>C  | p.Glu139Asp | Missense | 2 | 2 | 1 | 0 | 0 | 0 | 0 | P | LP | P | 0.994 |
| <i>RAF1</i>   | c.768G>T  | p.Arg256Ser | Missense | 2 | 2 | 1 | 0 | 0 | 0 | 0 | P | LP | P | 0.994 |

|                                                            |             |                   |                     |                                                 |           |           |            |           |           |           |                                |             |                                 |               |
|------------------------------------------------------------|-------------|-------------------|---------------------|-------------------------------------------------|-----------|-----------|------------|-----------|-----------|-----------|--------------------------------|-------------|---------------------------------|---------------|
| <i>RAF1</i>                                                | c.1472C>T   | p.Thr491Ile       | Missense            | 2                                               | 2         | 1         | 0          | 0         | 0         | 0         | P                              | LP          | P                               | 0.994         |
| <i>RAF1</i>                                                | c.781C>T    | p.Pro261Ser       | Missense            | 1                                               | 2         | 1         | 0          | 0         | 0         | 0         | P                              | LP          | LP                              | 0.988         |
| <b>EP classified as likely benign with BS3<sup>a</sup></b> |             |                   |                     | <b>Evidence Satisfied (MET BS3)<sup>b</sup></b> |           |           |            |           |           |           | <b>Categorical<sup>d</sup></b> |             | <b>Quantitative<sup>e</sup></b> |               |
| <b>Gene</b>                                                | <b>cDNA</b> | <b>Amino Acid</b> | <b>Variant Type</b> | <b>PP</b>                                       | <b>PM</b> | <b>PS</b> | <b>PVS</b> | <b>BP</b> | <b>BS</b> | <b>BA</b> | <b>EP Class</b>                | <b>-BS3</b> | <b>Class</b>                    | <b>Post_P</b> |
| <i>PTPN11</i>                                              | c.1678C>T   | p.Leu560Phe       | Missense            | 0                                               | 0         | 0         | 0          | 1         | 1         | 0         | LB                             | VUS         | LB                              | 0.0028        |

**Supp. Table S2: Expert-curated variants not meeting functional criteria (PS3/BS3).**

<sup>a</sup>Expert panel (EP)-curated variants that met neither PS3 or BS3 functional criteria are listed by gene, cDNA, protein, and variant type and are grouped by EP classification. Variants were curated by expert panels using the following reference transcripts: *PTPN11* (LRG\_614t1, intronic variants; NM\_002834.3, all others), *BRAF* (LRG\_299t1, intronic variants; NM\_004333.4, all others), *MAP2K1* (LRG\_725t1, intronic variants; NM\_002755.3, all others), *MYH7* (LRG\_384t1, intronic and splice variants; NM\_000257.3, all others), *HRAS* (NM\_005343.2), *RAF1* (LRG\_413t1, intronic variants; NM\_002880.3, all others), *KRAS* (NC\_000012.12, intronic variants; NM\_004985.4, all others), *SOS1* (NM\_005633.3), *SHOC2* (LRG\_753t1, 5' UTR variants; NM\_007373.3, all others), and *MAP2K2* (LRG\_750t1, 3' UTR variants; NM\_030662.3, all others). <sup>b</sup>Evidence Satisfied, as determined by expert panels in Gelb et al. (2018) and Kelly et al. (2018), displayed as the number satisfied in each abbreviated category described in Richards et al. (2015). The first letter of each code indicates support for a pathogenic (P) or benign (B) classification and the second letter indicates the assigned evidence strength: supporting (P), moderate (M), strong (S), very strong (VS), or stand-alone (A). <sup>c</sup>The final variant classification assessed according to categorical ACMG/AMP combining rules (Table 5 in Richards et al., 2015), with EP classifications considering only evidence satisfied in (b). <sup>d</sup>Variant class with the addition of either PS3 or BS3 criteria in the categorical interpretation framework (Table 5 in Richards et al.). <sup>e</sup>Variant class according to the quantitative, Bayesian-adapted framework was determined by posterior probability of pathogenicity (Post\_P). Post\_P was calculated by entering evidence totals by strength in Supplemental Table 1 from Tavtigian et al. (2018), using the default settings: Prior Probability (Prior\_P) = 0.100; Odds Path Very Strong = 350; Exponential progression (X) = 2.000. Each Post\_P was then assigned a variant classification as follows: benign <0.001; 0.001 ≤ likely benign < 0.1; 0.1 ≤ VUS < 0.90; 0.90 ≤ likely pathogenic < 0.99; 0.99 ≤ pathogenic. The last four columns show the variant classification according to Post\_P if strong pathogenic criteria (PS3) or strong benign criteria (BS3) were to be added within the quantitative framework (see manuscript text for details). ACMG/AMP, American College of Medical Genetics and Genomics/Association for Molecular Pathology; B, benign; BS3, well-established functional studies show no deleterious effect; CON, conflicting; EP, Expert Panel; LB, likely benign; LP, likely pathogenic; n/a, not available; P, pathogenic; Post\_P, posterior probability of pathogenicity; PS3, well established functional studies show a deleterious effect; Synonym., synonymous; VUS, variant of uncertain significance.

| EP classified as benign <sup>a</sup> |                                    |             |              | Evidence Satisfied (no PS3/BS3) <sup>b</sup> |    |    |     |    |    |    | Categorical <sup>c</sup> |                   |                   | Quantitative <sup>e</sup>                                                                                |        |      |        |      |        |
|--------------------------------------|------------------------------------|-------------|--------------|----------------------------------------------|----|----|-----|----|----|----|--------------------------|-------------------|-------------------|----------------------------------------------------------------------------------------------------------|--------|------|--------|------|--------|
| Gene                                 | cDNA                               | Amino Acid  | Variant Type | PP                                           | PM | PS | PVS | BP | BS | BA | EP Class                 | +PS3 <sup>d</sup> | +BS3 <sup>d</sup> | Class                                                                                                    | Post_P | +PS3 | Post_P | +BS3 | Post-P |
| <i>RAF1</i>                          | c.119G>A                           | p.Arg40His  | Missense     | 0                                            | 0  | 0  | 0   | 1  | 1  | 1  | B                        | CON               | B                 | All of these meet BA1, which is not included in Bayesian framework described by Tavtigian et al. (2018). |        |      |        |      |        |
| <i>BRAF</i>                          | c.1227A>G                          | p.Ser409=   | Synonym.     | 0                                            | 0  | 0  | 0   | 3  | 0  | 1  | B                        | CON               | B                 |                                                                                                          |        |      |        |      |        |
| <i>SHOC2</i>                         | c.1302C>T                          | p.Asn434=   | Synonym.     | 0                                            | 0  | 0  | 0   | 3  | 0  | 1  | B                        | CON               | B                 |                                                                                                          |        |      |        |      |        |
| <i>SOS1</i>                          | c.1230G>A                          | p.Gln410=   | Synonym.     | 0                                            | 0  | 0  | 0   | 3  | 0  | 1  | B                        | CON               | B                 |                                                                                                          |        |      |        |      |        |
| <i>BRAF</i>                          | c.1433-19A>G                       | n/a         | Intronic     | 1                                            | 0  | 0  | 0   | 2  | 0  | 1  | B                        | CON               | CON               |                                                                                                          |        |      |        |      |        |
| <i>RAF1</i>                          | c.1108+9_1108+21delGGG GCCCTCCC TT | n/a         | Intronic     | 0                                            | 0  | 0  | 0   | 2  | 0  | 1  | B                        | CON               | B                 |                                                                                                          |        |      |        |      |        |
| <i>HRAS</i>                          | c.257A>C                           | p.Asn86Thr  | Missense     | 0                                            | 0  | 0  | 0   | 1  | 0  | 1  | B                        | CON               | B                 |                                                                                                          |        |      |        |      |        |
| <i>KRAS</i>                          | c.531_533del GAA                   | p.Lys180del | Deletion     | 0                                            | 0  | 0  | 0   | 1  | 0  | 1  | B                        | CON               | B                 |                                                                                                          |        |      |        |      |        |
| <i>MAP2K1</i>                        | c.848C>T                           | p.Ala283Val | Missense     | 0                                            | 0  | 0  | 0   | 1  | 0  | 1  | B                        | CON               | B                 |                                                                                                          |        |      |        |      |        |
| <i>MAP2K1</i>                        | c.694-8_694-7dupTC                 | n/a         | Intronic     | 0                                            | 0  | 0  | 0   | 1  | 0  | 1  | B                        | CON               | B                 |                                                                                                          |        |      |        |      |        |
| <i>MAP2K2</i>                        | c.844C>T                           | p.Pro282Ser | Missense     | 0                                            | 0  | 0  | 0   | 1  | 0  | 1  | B                        | CON               | B                 |                                                                                                          |        |      |        |      |        |
| <i>PTPN11</i>                        | c.1658C>T                          | p.Thr553Met | Missense     | 0                                            | 0  | 0  | 0   | 1  | 0  | 1  | B                        | CON               | B                 |                                                                                                          |        |      |        |      |        |
| <i>SHOC2</i>                         | c.10A>C                            | p.Ser4Arg   | Missense     | 0                                            | 0  | 0  | 0   | 1  | 0  | 1  | B                        | CON               | B                 |                                                                                                          |        |      |        |      |        |
| <i>MYH7</i>                          | c.327C>T                           | p.Tyr109=   | Synonym.     | 0                                            | 0  | 0  | 0   | 1  | 0  | 1  | B                        | CON               | B                 |                                                                                                          |        |      |        |      |        |
| <i>MYH7</i>                          | c.3036C>T                          | p.Ala1012=  | Synonym.     | 0                                            | 0  | 0  | 0   | 1  | 0  | 1  | B                        | CON               | B                 |                                                                                                          |        |      |        |      |        |
| <i>MYH7</i>                          | c.2162+4G>A                        | n/a         | Intronic     | 0                                            | 0  | 0  | 0   | 1  | 0  | 1  | B                        | CON               | B                 |                                                                                                          |        |      |        |      |        |
| <i>BRAF</i>                          | c.968C>T                           | p.Ser323Leu | Missense     | 0                                            | 0  | 0  | 0   | 0  | 0  | 1  | B                        | CON               | B                 |                                                                                                          |        |      |        |      |        |
| <i>HRAS</i>                          | c.81T>C                            | p.His27=    | Synonym.     | 0                                            | 0  | 0  | 0   | 0  | 0  | 1  | B                        | CON               | B                 |                                                                                                          |        |      |        |      |        |
| <i>KRAS</i>                          | c.519T>C                           | p.Asp173=   | Synonym.     | 0                                            | 0  | 0  | 0   | 0  | 0  | 1  | B                        | CON               | B                 |                                                                                                          |        |      |        |      |        |
| <i>MAP2K2</i>                        | c.1162C>T                          | p.Arg388Trp | Missense     | 0                                            | 0  | 0  | 0   | 0  | 0  | 1  | B                        | CON               | B                 |                                                                                                          |        |      |        |      |        |
| <i>PTPN11</i>                        | c.525+12G>C                        | n/a         | Intronic     | 0                                            | 0  | 0  | 0   | 0  | 0  | 1  | B                        | CON               | B                 |                                                                                                          |        |      |        |      |        |
| <i>PTPN11</i>                        | c.854-32A>C                        | n/a         | Intronic     | 0                                            | 0  | 0  | 0   | 0  | 0  | 1  | B                        | CON               | B                 |                                                                                                          |        |      |        |      |        |
| <i>PTPN11</i>                        | c.925A>G                           | p.Ile309Val | Missense     | 0                                            | 0  | 0  | 0   | 0  | 0  | 1  | B                        | CON               | B                 |                                                                                                          |        |      |        |      |        |

| <i>RAF1</i>                                           | c.212A>G          | p.Asn71Ser   | Missense     | 0                                                  | 0  | 0  | 0   | 0  | 0  | 1  | B                              | CON               | B                 |                                 |        |      |        |      |         |
|-------------------------------------------------------|-------------------|--------------|--------------|----------------------------------------------------|----|----|-----|----|----|----|--------------------------------|-------------------|-------------------|---------------------------------|--------|------|--------|------|---------|
| <i>SHOC2</i>                                          | c.38A>C           | p.Glu13Ala   | Missense     | 0                                                  | 0  | 0  | 0   | 0  | 0  | 1  | B                              | CON               | B                 |                                 |        |      |        |      |         |
| <i>SOS1</i>                                           | c.749T>C          | p.Val250Ala  | Missense     | 0                                                  | 0  | 0  | 0   | 0  | 0  | 1  | B                              | CON               | B                 |                                 |        |      |        |      |         |
| <i>SOS1</i>                                           | c.2122G>A         | p.Ala708Thr  | Missense     | 0                                                  | 0  | 0  | 0   | 0  | 0  | 1  | B                              | CON               | B                 |                                 |        |      |        |      |         |
| <i>SOS1</i>                                           | c.73C>T           | p.Pro25Ser   | Missense     | 0                                                  | 0  | 0  | 0   | 0  | 0  | 1  | B                              | CON               | B                 |                                 |        |      |        |      |         |
| <i>SOS1</i>                                           | c.2371C>A         | p.Leu791Ile  | Missense     | 0                                                  | 0  | 0  | 0   | 0  | 0  | 1  | B                              | CON               | B                 |                                 |        |      |        |      |         |
| <i>SOS1</i>                                           | c.3032A>G         | p.Asn1011Ser | Missense     | 0                                                  | 0  | 0  | 0   | 0  | 0  | 1  | B                              | CON               | B                 |                                 |        |      |        |      |         |
| <i>BRAF</i>                                           | c.64G>A           | p.Asp22Asn   | Missense     | 0                                                  | 0  | 0  | 0   | 0  | 2  | 0  | B                              | CON               | B                 | B                               | 0.0003 | LB   | 0.0059 | B    | 0.00002 |
| <b>EP classified as likely benign<sup>a</sup></b>     |                   |              |              | <b>Evidence Satisfied (no PS3/BS3)<sup>b</sup></b> |    |    |     |    |    |    | <b>Categorical<sup>c</sup></b> |                   |                   | <b>Quantitative<sup>e</sup></b> |        |      |        |      |         |
| Gene                                                  | cDNA              | Amino Acid   | Variant Type | PP                                                 | PM | PS | PVS | BP | BS | BA | EP Class                       | +PS3 <sup>d</sup> | +BS3 <sup>d</sup> | Class                           | Post_P | +PS3 | Post_P | +BS3 | Post_P  |
| <i>SOS1</i>                                           | c.350T>G          | p.Val117Gly  | Missense     | 1                                                  | 0  | 0  | 0   | 1  | 1  | 0  | LB                             | CON               | CON               | LB                              | 0.006  | VUS  | 0.100  | B    | 0.0003  |
| <i>MYH7</i>                                           | c.4377G>T         | p.Lys1459Asn | Missense     | 1                                                  | 0  | 0  | 0   | 0  | 1  | 0  | LB                             | CON               | CON               | LB                              | 0.012  | VUS  | 0.188  | B    | 0.0007  |
| <i>SOS1</i>                                           | c.109A>G          | p.Thr37Ala   | Missense     | 0                                                  | 0  | 0  | 0   | 2  | 1  | 0  | LB                             | CON               | B                 | LB                              | 0.001  | LB   | 0.025  | B    | 0.0001  |
| <i>BRAF</i>                                           | c.92C>G           | p.Ala31Gly   | Missense     | 0                                                  | 0  | 0  | 0   | 1  | 1  | 0  | LB                             | CON               | B                 | LB                              | 0.003  | LB   | 0.051  | B    | 0.0002  |
| <i>RAF1</i>                                           | c.66T>G           | p.Phe22Leu   | Missense     | 0                                                  | 0  | 0  | 0   | 1  | 1  | 0  | LB                             | CON               | B                 | LB                              | 0.003  | LB   | 0.051  | B    | 0.0002  |
| <i>HRAS</i>                                           | c.510G>A          | p.Lys170=    | Synonym.     | 0                                                  | 0  | 0  | 0   | 3  | 0  | 0  | LB                             | CON               | LB                | LB                              | 0.012  | VUS  | 0.188  | B    | 0.0007  |
| <i>BRAF</i>                                           | c.111G>A          | p.Ser37=     | Synonym.     | 0                                                  | 0  | 0  | 0   | 2  | 0  | 0  | LB                             | CON               | LB                | LB                              | 0.025  | VUS  | 0.325  | LB   | 0.0014  |
| <i>KRAS</i>                                           | c.451-14T>C       | n/a          | Intronic     | 0                                                  | 0  | 0  | 0   | 2  | 0  | 0  | LB                             | CON               | LB                | LB                              | 0.025  | VUS  | 0.325  | LB   | 0.0014  |
| <i>MAP2K2</i>                                         | c.*8C>T           | n/a          | 3' UTR       | 0                                                  | 0  | 0  | 0   | 2  | 0  | 0  | LB                             | CON               | LB                | LB                              | 0.025  | VUS  | 0.325  | LB   | 0.0014  |
| <b>EP classified as likely pathogenic<sup>a</sup></b> |                   |              |              | <b>Evidence Satisfied (no PS3/BS3)<sup>b</sup></b> |    |    |     |    |    |    | <b>Categorical<sup>c</sup></b> |                   |                   | <b>Quantitative<sup>e</sup></b> |        |      |        |      |         |
| Gene                                                  | cDNA              | Amino Acid   | Variant Type | PP                                                 | PM | PS | PVS | BP | BS | BA | EP Class                       | +PS3 <sup>d</sup> | +BS3 <sup>d</sup> | Class                           | Post_P | +PS3 | Post_P | +BS3 | Post_P  |
| <i>MYH7</i>                                           | c.2539_2541delAAG | p.Lys847del  | Deletion     | 1                                                  | 2  | 1  | 0   | 0  | 0  | 0  | LP                             | P                 | CON               | LP                              | 0.988  | P    | 0.999  | VUS  | 0.812   |
| <i>MYH7</i>                                           | c.2539A>G         | p.Lys847Glu  | Missense     | 1                                                  | 2  | 1  | 0   | 0  | 0  | 0  | LP                             | P                 | CON               | LP                              | 0.988  | P    | 0.999  | VUS  | 0.812   |
| <i>MYH7</i>                                           | c.3158G>A         | p.Arg1053Gln | Missense     | 1                                                  | 2  | 1  | 0   | 0  | 0  | 0  | LP                             | P                 | CON               | LP                              | 0.988  | P    | 0.999  | VUS  | 0.812   |
| <i>MYH7</i>                                           | c.4066G>A         | p.Glu1356Lys | Missense     | 1                                                  | 2  | 1  | 0   | 0  | 0  | 0  | LP                             | P                 | CON               | LP                              | 0.988  | P    | 0.999  | VUS  | 0.812   |
| <i>MAP2K1</i>                                         | c.275T>G          | p.Leu92Arg   | Missense     | 3                                                  | 1  | 1  | 0   | 0  | 0  | 0  | LP                             | P                 | CON               | LP                              | 0.988  | P    | 0.999  | VUS  | 0.812   |
| <i>MAP2K2</i>                                         | c.619G>A          | p.Glu207Lys  | Missense     | 3                                                  | 1  | 1  | 0   | 0  | 0  | 0  | LP                             | P                 | CON               | LP                              | 0.988  | P    | 0.999  | VUS  | 0.812   |

|                                                |                   |                   |                     |                                                    |           |           |            |           |           |           |                                |                         |                         |                                 |               |             |               |             |               |
|------------------------------------------------|-------------------|-------------------|---------------------|----------------------------------------------------|-----------|-----------|------------|-----------|-----------|-----------|--------------------------------|-------------------------|-------------------------|---------------------------------|---------------|-------------|---------------|-------------|---------------|
| <i>RAF1</i>                                    | c.1082G>C         | p.Gly361Ala       | Missense            | 3                                                  | 1         | 1         | 0          | 0         | 0         | 0         | LP                             | P                       | CON                     | LP                              | 0.988         | P           | 0.999         | VUS         | 0.812         |
| <i>MYH7</i>                                    | c.5135G>A         | p.Arg1712Gln      | Missense            | 2                                                  | 1         | 1         | 0          | 0         | 0         | 0         | LP                             | P                       | CON                     | LP                              | 0.975         | P           | 0.999         | VUS         | 0.675         |
| <i>MYH7</i>                                    | c.428G>A          | p.Arg143Gln       | Missense            | 1                                                  | 1         | 1         | 0          | 0         | 0         | 0         | LP                             | P                       | CON                     | LP                              | 0.949         | P           | 0.997         | VUS         | 0.500         |
| <i>MYH7</i>                                    | c.3133C>T         | p.Arg1045Cys      | Missense            | 1                                                  | 1         | 1         | 0          | 0         | 0         | 0         | LP                             | P                       | CON                     | LP                              | 0.949         | P           | 0.997         | VUS         | 0.500         |
| <i>MYH7</i>                                    | c.4130C>T         | p.Thr1377Met      | Missense            | 1                                                  | 1         | 1         | 0          | 0         | 0         | 0         | LP                             | P                       | CON                     | LP                              | 0.949         | P           | 0.997         | VUS         | 0.500         |
| <i>MAP2K1</i>                                  | c.388T>C          | p.Tyr130His       | Missense            | 2                                                  | 3         | 0         | 0          | 0         | 0         | 0         | LP                             | P                       | CON                     | LP                              | 0.975         | P           | 0.999         | VUS         | 0.675         |
| <i>RAF1</i>                                    | c.769T>C          | p.Ser257Pro       | Missense            | 2                                                  | 4         | 0         | 0          | 0         | 0         | 0         | LP                             | P                       | CON                     | P                               | 0.994         | P           | 1.000         | VUS         | 0.900         |
| <i>RAF1</i>                                    | c.788T>G          | p.Val263Gly       | Missense            | 2                                                  | 4         | 0         | 0          | 0         | 0         | 0         | LP                             | P                       | CON                     | P                               | 0.994         | P           | 1.000         | VUS         | 0.900         |
| <i>MYH7</i>                                    | c.1106G>A         | p.Arg369Gln       | Missense            | 0                                                  | 4         | 0         | 0          | 0         | 0         | 0         | LP                             | P                       | CON                     | LP                              | 0.975         | P           | 0.999         | VUS         | 0.675         |
| <i>MAP2K2</i>                                  | c.400T>C          | p.Tyr134His       | Missense            | 3                                                  | 3         | 0         | 0          | 0         | 0         | 0         | LP                             | P                       | CON                     | LP                              | 0.988         | P           | 0.999         | VUS         | 0.812         |
| <i>MYH7</i>                                    | c.2608C>T         | p.Arg870Cys       | Missense            | 2                                                  | 3         | 0         | 0          | 0         | 0         | 0         | LP                             | P                       | CON                     | LP                              | 0.975         | P           | 0.999         | VUS         | 0.675         |
| <i>MYH7</i>                                    | c.2678C>T         | p.Ala893Val       | Missense            | 1                                                  | 3         | 0         | 0          | 0         | 1         | 0         | LP                             | CON                     | CON                     | VUS                             | 0.500         | LP          | 0.949         | LB          | 0.051         |
| <i>MYH7</i>                                    | c.2791_2793delGAG | p.Glu931del       | Deletion            | 1                                                  | 3         | 0         | 0          | 0         | 0         | 0         | LP                             | P                       | CON                     | LP                              | 0.949         | P           | 0.997         | VUS         | 0.500         |
| <i>MYH7</i>                                    | c.1157A>G         | p.Tyr386Cys       | Missense            | 1                                                  | 3         | 0         | 0          | 0         | 0         | 0         | LP                             | P                       | CON                     | LP                              | 0.949         | P           | 0.997         | VUS         | 0.500         |
| <i>HRAS</i>                                    | c.175G>A          | p.Ala59Thr        | Missense            | 4                                                  | 2         | 0         | 0          | 0         | 0         | 0         | LP                             | P                       | CON                     | LP                              | 0.975         | P           | 0.999         | VUS         | 0.675         |
| <i>BRAF</i>                                    | c.1595G>A         | p.Cys532Tyr       | Missense            | 2                                                  | 2         | 0         | 0          | 0         | 0         | 0         | LP                             | P                       | CON                     | LP                              | 0.900         | P           | 0.994         | VUS         | 0.325         |
| <i>MAP2K1</i>                                  | c.169A>C          | p.Lys57Gln        | Missense            | 2                                                  | 2         | 0         | 0          | 0         | 0         | 0         | LP                             | P                       | CON                     | LP                              | 0.900         | P           | 0.994         | VUS         | 0.325         |
| <i>MYH7</i>                                    | c.3658_3660delGAG | p.Glu1220del      | Deletion            | 2                                                  | 2         | 0         | 0          | 0         | 0         | 0         | LP                             | P                       | CON                     | LP                              | 0.900         | P           | 0.994         | VUS         | 0.325         |
| <i>MYH7</i>                                    | c.5401G>A         | p.Glu1801Lys      | Missense            | 2                                                  | 2         | 0         | 0          | 0         | 0         | 0         | LP                             | P                       | CON                     | LP                              | 0.900         | P           | 0.994         | VUS         | 0.325         |
| <i>MYH7</i>                                    | c.5740G>A         | p.Glu1914Lys      | Missense            | 2                                                  | 2         | 0         | 0          | 0         | 0         | 0         | LP                             | P                       | CON                     | LP                              | 0.900         | P           | 0.994         | VUS         | 0.325         |
| <i>PTPN11</i>                                  | c.155C>T          | p.Thr52Ile        | Missense            | 2                                                  | 2         | 0         | 0          | 0         | 0         | 0         | LP                             | P                       | CON                     | LP                              | 0.900         | P           | 0.994         | VUS         | 0.325         |
| <i>MYH7</i>                                    | c.4258C>T         | p.Arg1420Trp      | Missense            | 1                                                  | 2         | 0         | 0          | 0         | 0         | 0         | LP                             | LP                      | CON                     | VUS                             | 0.812         | LP          | 0.988         | VUS         | 0.188         |
| <i>MYH7</i>                                    | c.5726G>C         | p.Arg1909Pro      | Missense            | 1                                                  | 2         | 0         | 0          | 0         | 0         | 0         | LP                             | LP                      | CON                     | VUS                             | 0.812         | LP          | 0.988         | VUS         | 0.188         |
| <b>EP classified as pathogenic<sup>a</sup></b> |                   |                   |                     | <b>Evidence Satisfied (no PS3/BS3)<sup>b</sup></b> |           |           |            |           |           |           | <b>Categorical<sup>c</sup></b> |                         |                         | <b>Quantitative<sup>e</sup></b> |               |             |               |             |               |
| <b>Gene</b>                                    | <b>cDNA</b>       | <b>Amino Acid</b> | <b>Variant Type</b> | <b>PP</b>                                          | <b>PM</b> | <b>PS</b> | <b>PVS</b> | <b>BP</b> | <b>BS</b> | <b>BA</b> | <b>EP Class</b>                | <b>+PS3<sup>d</sup></b> | <b>+BS3<sup>d</sup></b> | <b>Class</b>                    | <b>Post_P</b> | <b>+PS3</b> | <b>Post_P</b> | <b>+BS3</b> | <b>Post_P</b> |
| <i>MAP2K2</i>                                  | c.169T>G          | p.Phe57Val        | Missense            | 2                                                  | 2         | 0         | 1          | 0         | 0         | 0         | P                              | P                       | CON                     | P                               | 1.000         | P           | 1.000         | P           | 0.994         |
| <i>MYH7</i>                                    | c.2167C>T         | p.Arg723Cys       | Missense            | 1                                                  | 4         | 2         | 0          | 1         | 0         | 0         | P                              | CON                     | CON                     | P                               | 1.000         | P           | 1.000         | P           | 0.999         |

|                                         |             |                   |                     |                                                    |           |           |            |           |           |           |                                |                         |                         |                                 |               |             |               |             |               |
|-----------------------------------------|-------------|-------------------|---------------------|----------------------------------------------------|-----------|-----------|------------|-----------|-----------|-----------|--------------------------------|-------------------------|-------------------------|---------------------------------|---------------|-------------|---------------|-------------|---------------|
| MYH7                                    | c.1207C>T   | p.Arg403Trp       | Missense            | 1                                                  | 3         | 2         | 0          | 0         | 0         | 0         | P                              | P                       | CON                     | P                               | 1.000         | P           | 1.000         | P           | 0.997         |
| MYH7                                    | c.2146G>A   | p.Gly716Arg       | Missense            | 1                                                  | 3         | 2         | 0          | 0         | 0         | 0         | P                              | P                       | CON                     | P                               | 1.000         | P           | 1.000         | P           | 0.997         |
| MYH7                                    | c.2156G>A   | p.Arg719Gln       | Missense            | 1                                                  | 3         | 2         | 0          | 0         | 0         | 0         | P                              | P                       | CON                     | P                               | 1.000         | P           | 1.000         | P           | 0.997         |
| MYH7                                    | c.2167C>G   | p.Arg723Gly       | Missense            | 1                                                  | 3         | 2         | 0          | 0         | 0         | 0         | P                              | P                       | CON                     | P                               | 1.000         | P           | 1.000         | P           | 0.997         |
| BRAF                                    | c.1785T>G   | p.Phe595Leu       | Missense            | 3                                                  | 2         | 2         | 0          | 0         | 0         | 0         | P                              | P                       | CON                     | P                               | 1.000         | P           | 1.000         | P           | 0.997         |
| PTPN11                                  | c.1529A>C   | p.Gln510Pro       | Missense            | 3                                                  | 2         | 2         | 0          | 0         | 0         | 0         | P                              | P                       | CON                     | P                               | 1.000         | P           | 1.000         | P           | 0.997         |
| HRAS                                    | c.37G>T     | p.Gly13Cys        | Missense            | 2                                                  | 2         | 2         | 0          | 0         | 0         | 0         | P                              | P                       | CON                     | P                               | 1.000         | P           | 1.000         | P           | 0.994         |
| SOS1                                    | c.806T>C    | p.Met269Thr       | Missense            | 2                                                  | 2         | 2         | 0          | 0         | 0         | 0         | P                              | P                       | CON                     | P                               | 1.000         | P           | 1.000         | P           | 0.994         |
| SOS1                                    | c.1654A>G   | p.Arg552Gly       | Missense            | 2                                                  | 2         | 2         | 0          | 0         | 0         | 0         | P                              | P                       | CON                     | P                               | 1.000         | P           | 1.000         | P           | 0.994         |
| MYH7                                    | c.788T>C    | p.Ile263Thr       | Missense            | 1                                                  | 2         | 2         | 0          | 0         | 0         | 0         | P                              | P                       | CON                     | P                               | 0.999         | P           | 1.000         | LP          | 0.988         |
| MYH7                                    | c.2722C>G   | p.Leu908Val       | Missense            | 1                                                  | 2         | 2         | 0          | 0         | 0         | 0         | P                              | P                       | CON                     | P                               | 0.999         | P           | 1.000         | LP          | 0.988         |
| MYH7                                    | c.1988G>A   | p.Arg663His       | Missense            | 0                                                  | 2         | 2         | 0          | 0         | 0         | 0         | P                              | P                       | CON                     | P                               | 0.999         | P           | 1.000         | LP          | 0.975         |
| MYH7                                    | c.2609G>A   | p.Arg870His       | Missense            | 0                                                  | 2         | 2         | 0          | 0         | 0         | 0         | P                              | P                       | CON                     | P                               | 0.999         | P           | 1.000         | LP          | 0.975         |
| MYH7                                    | c.2717A>G   | p.Asp906Gly       | Missense            | 0                                                  | 2         | 2         | 0          | 0         | 0         | 0         | P                              | P                       | CON                     | P                               | 0.999         | P           | 1.000         | LP          | 0.975         |
| PTPN11                                  | c.1530G>C   | p.Gln510His       | Missense            | 2                                                  | 1         | 2         | 0          | 0         | 0         | 0         | P                              | P                       | CON                     | P                               | 0.999         | P           | 1.000         | LP          | 0.975         |
| MYH7                                    | c.2221G>C   | p.Gly741Arg       | Missense            | 2                                                  | 4         | 1         | 0          | 0         | 0         | 0         | P                              | P                       | CON                     | P                               | 1.000         | P           | 1.000         | P           | 0.994         |
| MYH7                                    | c.1358G>A   | p.Arg453His       | Missense            | 1                                                  | 4         | 1         | 0          | 0         | 0         | 0         | P                              | P                       | CON                     | P                               | 0.999         | P           | 1.000         | LP          | 0.988         |
| MYH7                                    | c.2221G>T   | p.Gly741Trp       | Missense            | 1                                                  | 4         | 1         | 0          | 0         | 0         | 0         | P                              | P                       | CON                     | P                               | 0.999         | P           | 1.000         | LP          | 0.988         |
| HRAS                                    | c.173C>T    | p.Thr58Ile        | Missense            | 3                                                  | 3         | 1         | 0          | 0         | 0         | 0         | P                              | P                       | CON                     | P                               | 0.999         | P           | 1.000         | LP          | 0.988         |
| BRAF                                    | c.730A>C    | p.Thr244Pro       | Missense            | 2                                                  | 3         | 1         | 0          | 0         | 0         | 0         | P                              | P                       | CON                     | P                               | 0.999         | P           | 1.000         | LP          | 0.975         |
| PTPN11                                  | c.781C>T    | p.Leu261Phe       | Missense            | 1                                                  | 3         | 1         | 0          | 0         | 0         | 0         | P                              | P                       | CON                     | P                               | 0.997         | P           | 1.000         | LP          | 0.949         |
| MYH7                                    | c.1750G>C   | p.Gly584Arg       | Missense            | 1                                                  | 3         | 1         | 0          | 0         | 0         | 0         | P                              | P                       | CON                     | P                               | 0.997         | P           | 1.000         | LP          | 0.949         |
| MYH7                                    | c.2681A>G   | p.Glu894Gly       | Missense            | 1                                                  | 3         | 1         | 0          | 0         | 0         | 0         | P                              | P                       | CON                     | P                               | 0.997         | P           | 1.000         | LP          | 0.949         |
| MYH7                                    | c.2207T>C   | p.Ile736Thr       | Missense            | 0                                                  | 3         | 1         | 0          | 0         | 0         | 0         | P                              | P                       | CON                     | P                               | 0.994         | P           | 1.000         | LP          | 0.900         |
| KRAS                                    | c.101C>T    | p.Pro34Leu        | Missense            | 2                                                  | 2         | 1         | 0          | 0         | 0         | 0         | P                              | P                       | CON                     | P                               | 0.994         | P           | 1.000         | LP          | 0.900         |
| MYH7                                    | c.2513C>T   | p.Pro838Leu       | Missense            | 2                                                  | 2         | 1         | 0          | 0         | 0         | 0         | P                              | P                       | CON                     | P                               | 0.994         | P           | 1.000         | LP          | 0.900         |
| KRAS                                    | c.15A>T     | p.Lys5Asn         | Missense            | 2                                                  | 2         | 1         | 0          | 0         | 0         | 0         | P                              | P                       | CON                     | P                               | 0.994         | P           | 1.000         | LP          | 0.900         |
| <b>EP classified as VUS<sup>a</sup></b> |             |                   |                     | <b>Evidence Satisfied (no PS3/BS3)<sup>b</sup></b> |           |           |            |           |           |           | <b>Categorical<sup>c</sup></b> |                         |                         | <b>Quantitative<sup>e</sup></b> |               |             |               |             |               |
| <b>Gene</b>                             | <b>cDNA</b> | <b>Amino Acid</b> | <b>Variant Type</b> | <b>PP</b>                                          | <b>PM</b> | <b>PS</b> | <b>PVS</b> | <b>BP</b> | <b>BS</b> | <b>BA</b> | <b>Class</b>                   | <b>+PS3<sup>d</sup></b> | <b>+BS3<sup>d</sup></b> | <b>Class</b>                    | <b>Post_P</b> | <b>+PS3</b> | <b>Post_P</b> | <b>+BS3</b> | <b>Post_P</b> |

|               |                  |              |              |   |   |   |   |   |   |   |     |     |     |     |       |     |       |     |        |
|---------------|------------------|--------------|--------------|---|---|---|---|---|---|---|-----|-----|-----|-----|-------|-----|-------|-----|--------|
| <i>MYH7</i>   | c.732+1G>A       | n/a          | Splice donor | 1 | 2 | 0 | 0 | 0 | 0 | 0 | VUS | LP  | CON | VUS | 0.812 | LP  | 0.988 | VUS | 0.188  |
| <i>MYH7</i>   | c.3169G>A        | p.Gly1057Ser | Missense     | 1 | 2 | 0 | 0 | 0 | 0 | 0 | VUS | LP  | CON | VUS | 0.812 | LP  | 0.988 | VUS | 0.188  |
| <i>MYH7</i>   | c.1477_1478delAT | p.Met493fs   | Frameshift   | 0 | 2 | 0 | 0 | 0 | 0 | 0 | VUS | LP  | CON | VUS | 0.675 | LP  | 0.975 | VUS | 0.100  |
| <i>MYH7</i>   | c.4588C>T        | p.Arg1530*   | Nonsense     | 0 | 2 | 0 | 0 | 0 | 0 | 0 | VUS | LP  | CON | VUS | 0.675 | LP  | 0.975 | VUS | 0.100  |
| <i>RAF1</i>   | c.1193G>T        | p.Arg398Leu  | Missense     | 2 | 1 | 0 | 0 | 0 | 0 | 0 | VUS | LP  | CON | VUS | 0.675 | LP  | 0.975 | VUS | 0.100  |
| <i>MYH7</i>   | c.4276G>A        | p.Glu1426Lys | Missense     | 2 | 1 | 0 | 0 | 0 | 0 | 0 | VUS | LP  | CON | VUS | 0.675 | LP  | 0.975 | VUS | 0.100  |
| <i>MYH7</i>   | c.5302G>A        | p.Glu1768Lys | Missense     | 2 | 1 | 0 | 0 | 0 | 0 | 0 | VUS | LP  | CON | VUS | 0.675 | LP  | 0.975 | VUS | 0.100  |
| <i>MYH7</i>   | c.5329G>A        | p.Ala1777Thr | Missense     | 2 | 1 | 0 | 0 | 0 | 0 | 0 | VUS | LP  | CON | VUS | 0.675 | LP  | 0.975 | VUS | 0.100  |
| <i>MYH7</i>   | c.5588G>A        | p.Arg1863Gln | Missense     | 2 | 1 | 0 | 0 | 0 | 0 | 0 | VUS | LP  | CON | VUS | 0.675 | LP  | 0.975 | VUS | 0.100  |
| <i>MYH7</i>   | c.4354-7C>T      | n/a          | Intronic     | 1 | 1 | 0 | 0 | 1 | 0 | 0 | VUS | CON | CON | VUS | 0.325 | LP  | 0.900 | LB  | 0.025  |
| <i>HRAS</i>   | c.277A>G         | p.Ile93Val   | Missense     | 1 | 1 | 0 | 0 | 0 | 0 | 0 | VUS | LP  | CON | VUS | 0.500 | LP  | 0.949 | LB  | 0.051  |
| <i>MYH7</i>   | c.2360G>A        | p.Arg787His  | Missense     | 0 | 1 | 0 | 0 | 1 | 0 | 0 | VUS | CON | CON | VUS | 0.188 | VUS | 0.812 | LB  | 0.012  |
| <i>SHOC2</i>  | c.519G>A         | p.Met173Ile  | Missense     | 0 | 1 | 0 | 0 | 0 | 0 | 0 | VUS | LP  | CON | VUS | 0.325 | LP  | 0.900 | LB  | 0.025  |
| <i>PTPN11</i> | c.244A>G         | p.Met82Val   | Missense     | 1 | 0 | 0 | 0 | 1 | 0 | 0 | VUS | CON | CON | VUS | 0.100 | VUS | 0.675 | LB  | 0.006  |
| <i>MYH7</i>   | c.3981C>A        | p.Asn1327Lys | Missense     | 1 | 0 | 0 | 0 | 0 | 1 | 0 | VUS | CON | CON | LB  | 0.012 | VUS | 0.188 | B   | 0.0007 |
| <i>MAP2K2</i> | c.281C>T         | p.Ser94Leu   | Missense     | 1 | 0 | 0 | 0 | 0 | 0 | 0 | VUS | VUS | CON | VUS | 0.188 | VUS | 0.812 | LB  | 0.012  |
| <i>MYH7</i>   | c.3286G>T        | p.Asp1096Tyr | Missense     | 1 | 0 | 0 | 0 | 0 | 0 | 0 | VUS | VUS | CON | VUS | 0.188 | VUS | 0.812 | LB  | 0.012  |
| <i>MYH7</i>   | c.3578G>A        | p.Arg1193His | Missense     | 1 | 0 | 0 | 0 | 0 | 0 | 0 | VUS | VUS | CON | VUS | 0.188 | VUS | 0.812 | LB  | 0.012  |
| <i>MYH7</i>   | c.5326A>G        | p.Ser1776Gly | Missense     | 1 | 0 | 0 | 0 | 0 | 0 | 0 | VUS | VUS | CON | VUS | 0.188 | VUS | 0.812 | LB  | 0.012  |
| <i>MAP2K2</i> | c.784G>A         | p.Val262Ile  | Missense     | 0 | 0 | 0 | 0 | 1 | 0 | 0 | VUS | CON | LB  | LB  | 0.051 | VUS | 0.500 | LB  | 0.003  |
| <i>RAF1</i>   | c.935T>C         | p.Val312Ala  | Missense     | 0 | 0 | 0 | 0 | 1 | 0 | 0 | VUS | CON | LB  | LB  | 0.051 | VUS | 0.500 | LB  | 0.003  |
| <i>MYH7</i>   | c.3382G>A        | p.Ala1128Thr | Missense     | 0 | 0 | 0 | 0 | 0 | 0 | 0 | VUS | VUS | VUS | VUS | 0.100 | VUS | 0.675 | LB  | 0.006  |
| <i>MYH7</i>   | c.4909G>A        | p.Ala1637Thr | Missense     | 0 | 0 | 0 | 0 | 0 | 0 | 0 | VUS | VUS | VUS | VUS | 0.100 | VUS | 0.675 | LB  | 0.006  |
| <i>MYH7</i>   | c.5704G>C        | p.Glu1902Gln | Missense     | 0 | 0 | 0 | 0 | 0 | 0 | 0 | VUS | VUS | VUS | VUS | 0.100 | VUS | 0.675 | LB  | 0.006  |
| <i>SHOC2</i>  | c.-1C>T          | n/a          | 5' UTR       | 0 | 0 | 0 | 0 | 0 | 0 | 0 | VUS | VUS | VUS | VUS | 0.100 | VUS | 0.675 | LB  | 0.006  |
